# Supplementary material for: CX3CR1 regulates intestinal macrophage homeostasis, bacterial translocation, and colitogenic Th17 responses in mice
Source: JCI journal article supplement (doi:10.1172/jci59150), 2011-11-01
Supplement: sd1 [file 1]

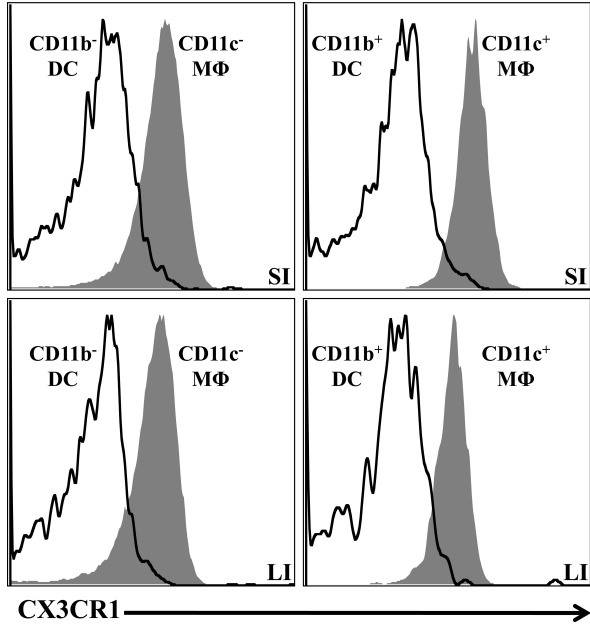

**Figure S1. LP MΦ express CX3CR1**

CX3CR1 surface expression in LP MΦ (solid histograms) and DCs (open histograms) in the small (SI) and large (LI) intestine of CX3CR1<sup>+/+</sup> mice, assessed by flow cytometry and gated as in Figure 1A. Data are representative of three independent experiments.

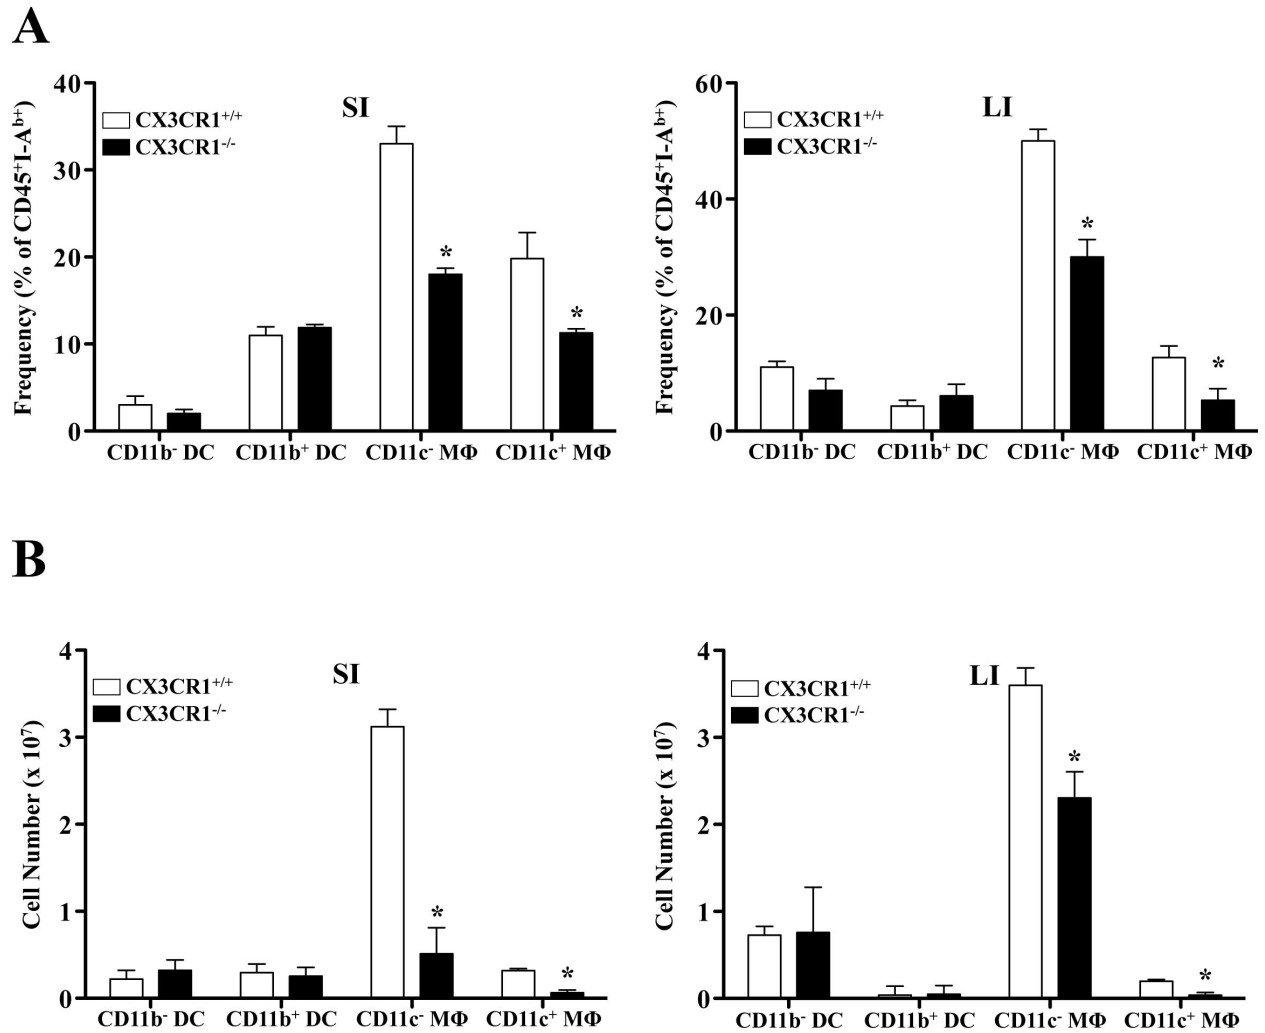

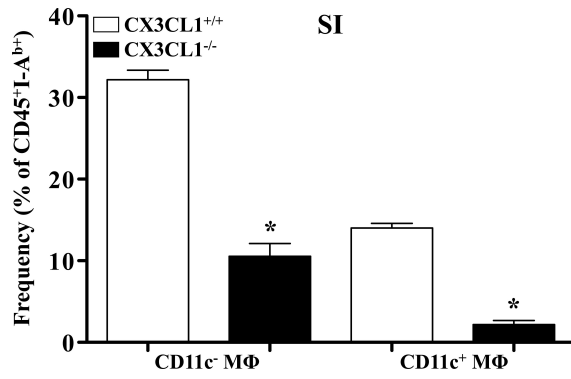

**Figure S3. CX3CL1-deficient mice have a specific reduction in LP MΦ**

Percentage of CD45<sup>+</sup> MHC-II<sup>+</sup> MΦ in the small (SI) intestine of CX3CL1<sup>-/-</sup> or CX3CL1<sup>+/+</sup> mice. Data are representative of two independent experiments. Error bars represent SEM. \*, p < 0.05.

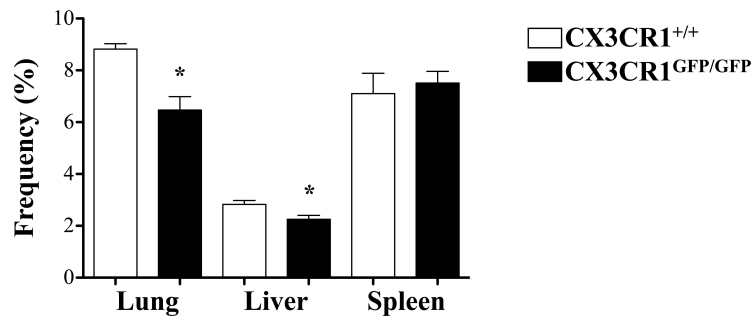

**Figure S4. CX3CR1-deficient mice have a reduction in lung and liver MΦ**

Percentage of CD45<sup>+</sup> MHC-II<sup>+</sup> MΦ in the lung, liver, and spleen of CX3CR1<sup>GFP/GFP</sup> or CX3CR1<sup>+/+</sup> mice. Data are representative of two independent experiments. Error bars represent SEM. \*, p < 0.05.

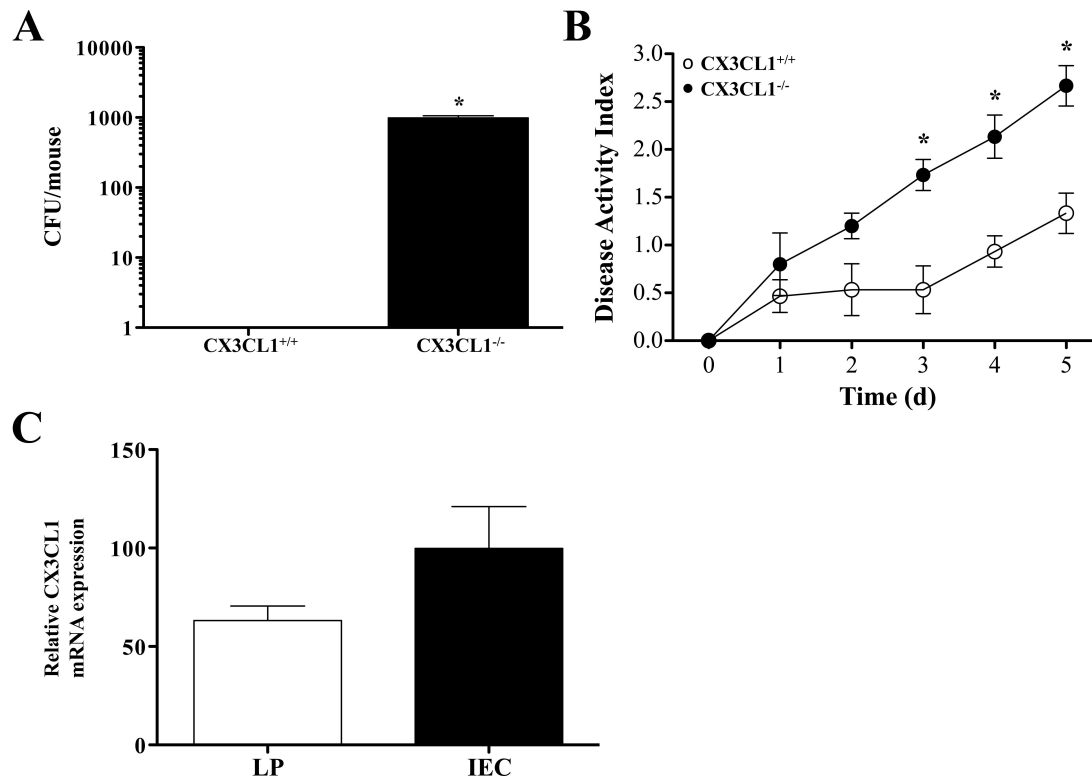

**Figure S5. CX3CL1-deficient mice exhibit enhanced bacterial translocation and colitis**

A) CFU per mouse in the mLN of CX3CL1<sup>-/-</sup> and CX3CL1<sup>+/+</sup> mice. B) Severity of colitis in DSS-treated CX3CL1<sup>-/-</sup> or CX3CL1<sup>+/+</sup> mice as measured by stool consistency, presence of fecal blood and weight loss. C) qRT-PCR for CX3CL1 mRNA expression in isolated intestinal LP or IEC from CX3CL1<sup>+/+</sup> mice. Data are representative of two independent experiments. Error bars represent SEM. \*,  $p < 0.05$ .

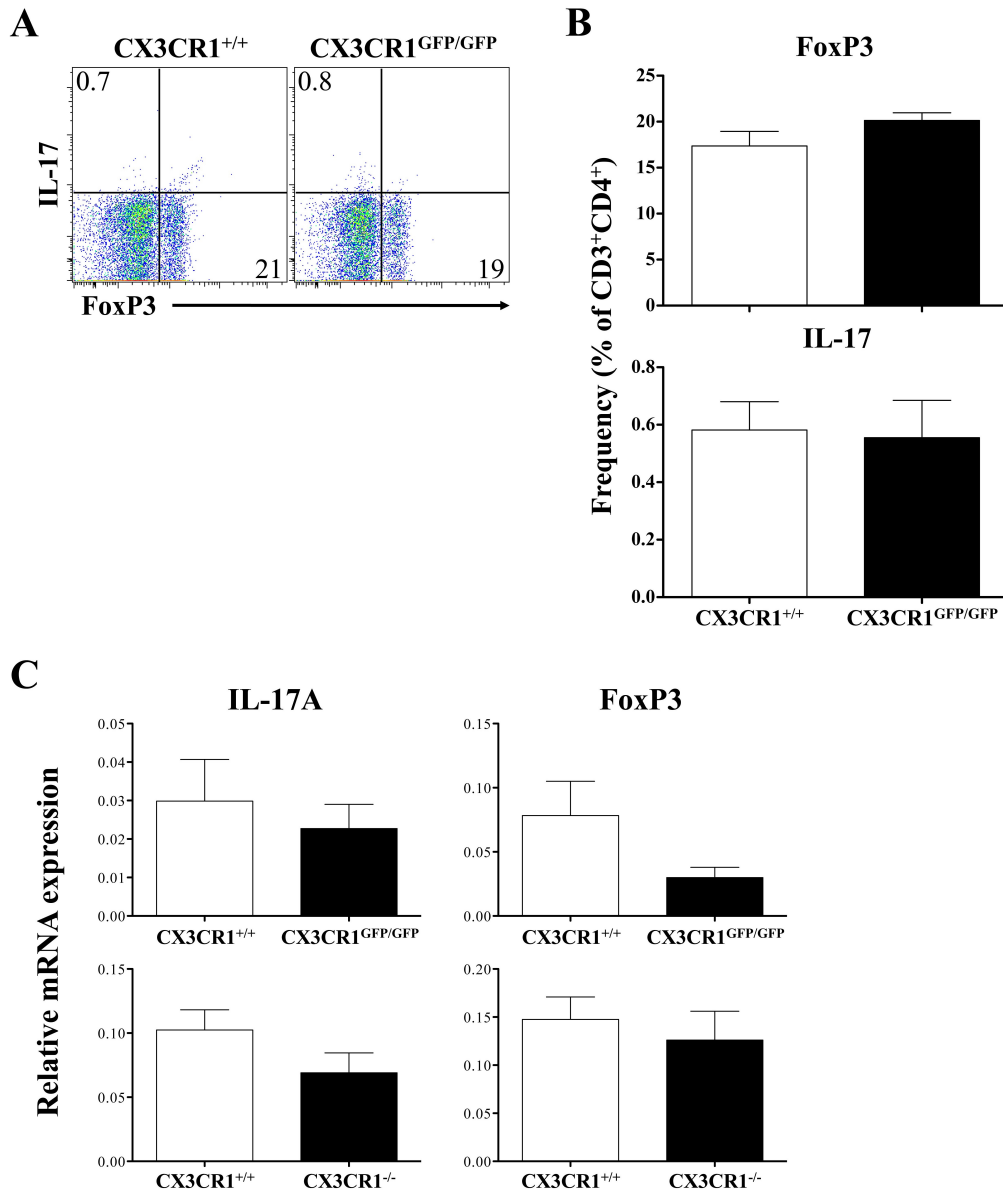

**Figure S6. CX3CR1 deficiency does not affect  $T_H17$  and Foxp3<sup>+</sup> Treg cells during the steady-state**

A) Flow cytometry of intracellular cytokine production by colonic CD4 T cells from CX3CR1<sup>GFP/GFP</sup> or CX3CR1<sup>+/+</sup> mice. Numbers in outlined areas indicate percentage cells in gate. B) Percentage of IL-17A<sup>+</sup> and Foxp3<sup>+</sup> cells in the large intestine of CX3CR1<sup>GFP/GFP</sup> or CX3CR1<sup>+/+</sup> mice. C) qRT-PCR for IL-17 and Foxp3 mRNA expression in isolated intestinal LP from CX3CR1<sup>+/+</sup> and CX3CR1<sup>GFP/GFP</sup> mice. Data are representative of two (C) or three (A,B) independent experiments. Error bars represent SEM. \*,  $p < 0.05$ .

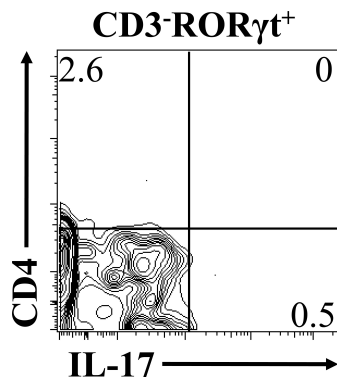

**Figure S7. IL-17 is not produced by innate lymphoid cells in CX3CR1-deficient mice**  
Flow cytometry of intracellular cytokine production by colonic innate lymphoid cells from CX3CR1<sup>GFP/GFP</sup> mice. Numbers in outlined areas indicate percentage cells in gate. Data are representative of three independent experiments.

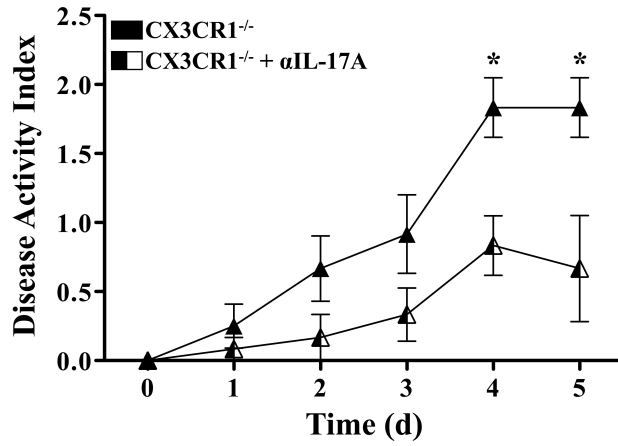

**Figure S8. Enhanced IL-17 responses contribute to colitis in CX3CR1-deficient mice**  
Severity of colitis in DSS-treated CX3CR1<sup>-/-</sup> or CX3CR1<sup>+/+</sup> mice, in the presence of neutralizing IL-17A antibody or isotype control. Data are representative of two independent experiments. \*, p < 0.05.



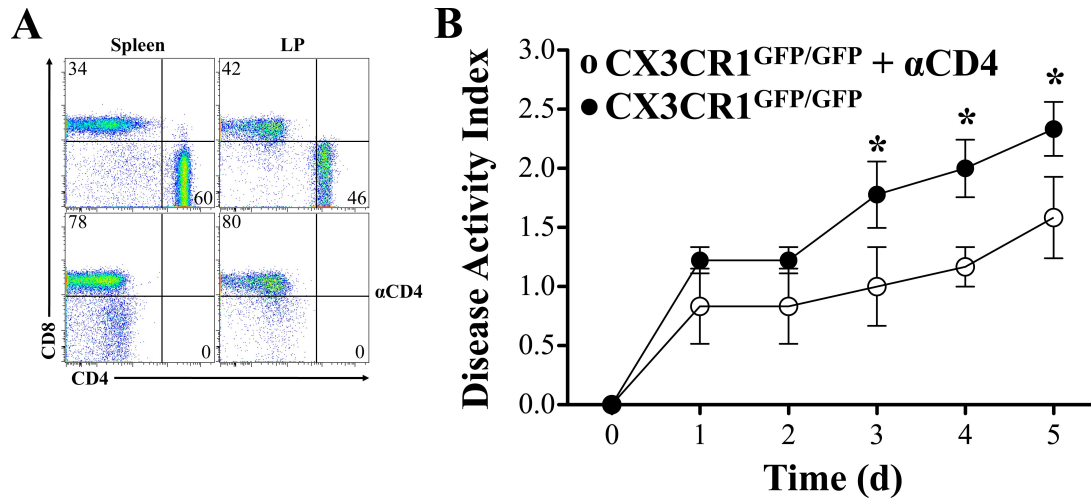

**Figure S9. CD4-produced IL-17 contributes to colitis in CX3CR1-deficient mice**

A) Flow cytometry of *in vivo* CD4 depletion in the spleen and LP from CX3CR1<sup>GFP/GFP</sup> mice. Numbers in outlined areas indicate percentage cells in gate. Percentage of IL-17A<sup>+</sup> and FoxP3<sup>+</sup> cells in the large intestine of CX3CR1<sup>GFP/GFP</sup> or CX3CR1<sup>+/+</sup> mice. B) Severity of colitis in DSS-treated CX3CR1<sup>GFP/GFP</sup> mice, after CD4 depletion. Data are representative of one experiment with five mice per group. Error bars represent SEM. \*, p < 0.05.

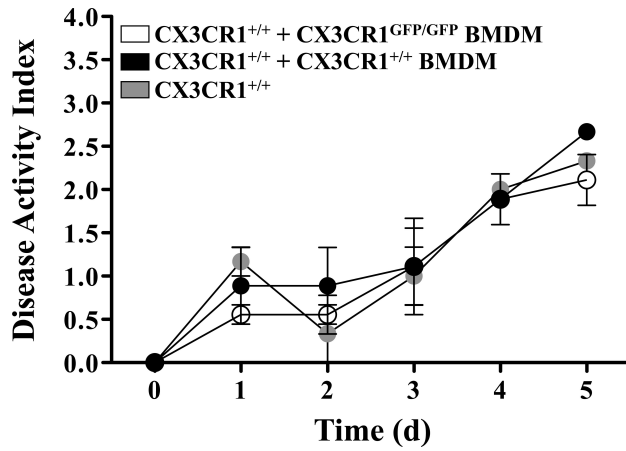

**Figure S10. BMDM transfer does not ameliorate colitis in CX3CR1<sup>+/+</sup> mice**

Severity of colitis in DSS-treated CX3CR1<sup>+/+</sup> mice, after adoptive transfer of CX3CR1<sup>GFP/GFP</sup> or CX3CR1<sup>+/+</sup> BMDM. Data are representative of one experiment with three mice per group. Error bars represent SEM. \*, p < 0.05.

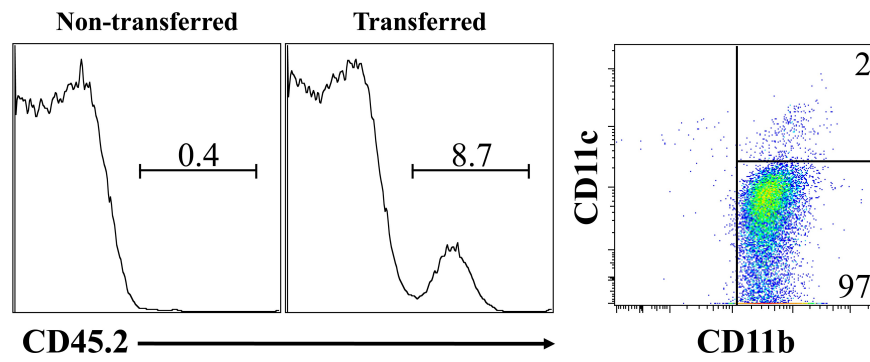

**Figure S11. Bone marrow-derived macrophages migrate to the intestine**

Percentage of transferred BMDM, defined as  $CD45.2^+ CD11b^+ CD11c^-$ , in the LI LP of CD45.1 mice at day 5 post-adoptive transfer. Cells were pre-gated as  $MHC-II^+$ . Data are representative of one experiment with four mice.
